# Supplementary material for: Cardiovascular Effects of PCB 126 (3,3’,4,4’,5-Pentachlorobiphenyl) in Zebrafish Embryos and Impact of Co-Exposure to Redox Modulating Chemicals
Source: MDPI journal article supplement (doi:10.3390/ijms20051065), 2019-03-01
Supplement: s1 [file s1]

# Cardiovascular effects of PCB 126 (3,3',4,4',5-Pentachlorobiphenyl) in zebrafish embryos and impact of co-exposure to redox modulating chemicals

Elisabet Teixidó <sup>1,2,\*</sup>, Marta Barenys <sup>2</sup>, Ester Piqué <sup>2</sup>, Joan M. Llobet and Jesús Gómez-Catalán <sup>2</sup>

<sup>1</sup> Department of Bioanalytical Ecotoxicology, Helmholtz Centre for Environmental Research - UFZ, Permoserstraße 15, 04318 Leipzig, Germany 1; elisabet.teixido@ufz.de

<sup>2</sup> GRET-Toxicology Unit, Department of Pharmacology, Toxicology and Therapeutic Chemistry, Faculty of Pharmacy and Food Sciences, University of Barcelona, 08028, Barcelona, Spain.

\* Correspondence: elisabet.teixido@ufz.de; Tel.: ++49 341 235 1509

## Supplementary material

**Table S1.** Target genes and specific primers used in this study.

| Gene name    | Common name                                     | Accession number | Primer sequence (Forward and reverse 5'-3')   | Reference  |
|--------------|-------------------------------------------------|------------------|-----------------------------------------------|------------|
| <b>GAPDH</b> | <i>Glyceraldehyde-3-phosphate dehydrogenase</i> | NM_001115114     | AGGCAGAAGGCGGCAAAC<br>AAGACACCAGTAGACTCCACAAC | [1]        |
| <b>HSP70</b> | <i>Heat shock cognate 70-kd</i>                 | NM_131397        | GGTTCGATGACCCTGTAGTG<br>GGACCATGGAGGAAATCTCT  | This study |
| <b>GPX1A</b> | <i>Glutathione peroxidase 1a</i>                | NM_001007281     | ACCTGTCCGCGAAACTATTG<br>TGACTGTTGTGCCTCAAAGC  | This study |
| <b>CAT</b>   | <i>Catalase</i>                                 | NM_130912        | GCTCCACCACGTGAATAAAC<br>GGAGCTCAACTCTTCATCCA  | This study |
| <b>SOD1</b>  | <i>Superoxide dismutase 1, soluble</i>          | Y12236           | TGTCAGCGGGCTAGTGCTT<br>GTCGTCTGGCTTGTGGAGTG   | [2]        |
| <b>SOD2</b>  | <i>Superoxide dismutase 2, mitochondrial</i>    | NM_199976        | AGCCAAAGTCACGCTTTATG<br>GGTGATGTGACAACCCAAGT  | This study |
| <b>CYP1A</b> | <i>Cytocrome P450, family 1, subfamily A</i>    | AF210727         | CGACTGCAAAGAGAATTGGA<br>CTTTGGATGTGCAGTGAGGA  | [3]        |
| <b>GSTP1</b> | <i>Glutathione S-transferase pi 1</i>           | NM_131734.3      | TCATTGACGTGATGAACGAC<br>ATCTGATCACCAACCAGGAA  | This study |

[1] Klüver, N.; Yang, L.; Busch, W.; Scheffler, K.; Renner, P.; Strähle, U.; Scholz, S. Transcriptional Response of Zebrafish Embryos Exposed to Neurotoxic Compounds Reveals a Muscle Activity Dependent hspb11 Expression *PLoS One* **2011**, *6*, e29063.

[2] Banni, M.; Chouchene, L.; Said, K.; Kerkeni, A.; Messaoudi, I. Mechanisms underlying the protective effect of zinc and selenium against cadmium-induced oxidative stress in zebrafish *Danio rerio*. *BioMetals* **2011**, *24*, 981–992.

[3] Grimes, A. C.; Erwin, K. N.; Stadt, H. A.; Hunter, G.L.; Gefroh, H. A.; Tsai, H. J.; Kirby, M. L. PCB126 exposure disrupts zebrafish ventricular and branchial but not early neural crest development. *Toxicol Sci* **2008**, *106*, 193–205.
